# Supplementary material for: The Eukaryotic Ancestor Had a Complex Ubiquitin Signaling System of Archaeal Origin
Source: PubMed Central journal article supplement (PMC4327156; doi:10.1093/molbev/msu334), 2014-12-17
Supplement: supp_msu334_Supplementary3_FileS1.pdf [file supp_msu334_Supplementary3_FileS1.pdf]

\*\*\*\*\*JAB\*\*\*\*\*

>315426919\_Candidatus\_Caldiarchaeum\_subterraneum  
MRVRIYPLALAKVVKHAASSLQREVAGLLVGKSAGKVL EIWDAVTGEQYGT PAYVQLDEMVMKVAEELS  
KSDKNLYIVGWYHSHPGLDVFLSPTDIDTQKRYQAMFSKAVALVDDPVDYAKTRRISLKFQVFQISKEG  
RVVSLPVSIGVHRAKLESTFHALSTFDFMHILGESSGKTRDKPLSEEQESLLGKAKKLF GA

>315426996\_Candidatus\_Caldiarchaeum\_subterraneum  
MRVRIYPLALAKVVKHAASSLQREVAGLLVGKSAGKVL EIWDAVTGEQYGT PAYVQLDEMVMKVAEELS  
KSDKNLYIVGWYHSHPGLDVFLSPTDIDTQKRYQAMFSKAVALVDDPVDYAKTRRISLKFQVFQISKEG  
RVVSLPVSIGVHRAKLESTFHALSTFDFMHILGESSGKTRDKPLSEEQESLLGKAKKLF GA

>315428083\_Candidatus\_Caldiarchaeum\_subterraneum  
MRVRIYPLALAKVVKHAASSLQREVAGLLVGKSAGKVL EIWDAVTGEQYGT PAYVQLDEMVMKVAEELS  
KSDKNLYIVGWYHSHPGLDVFLSPTDIDTQKRYQAMFSKAVALVDDPVDYAKTRRISLKFQVFQISKEG  
RVVSLPVSIGVHRAKLESTFHALSTFDFMHILGESSGKTRDKPLSEEQESLLGKAKKLF GA

>343485670\_Candidatus\_Caldiarchaeum\_subterraneum  
MRVRIYPLALAKVVKHAASSLQREVAGLLVGKSAGKVL EIWDAVTGEQYGT PAYVQLDEMVMKVAEELS  
KSDKNLYIVGWYHSHPGLDVFLSPTDIDTQKRYQAMFSKAVALVDDPVDYAKTRRISLKFQVFQISKEG  
RVVSLPVSIGVHRAKLESTFHALSTFDFMHILGESSGKTRDKPLSEEQESLLGKAKKLF GA

>526887488\_Candidatus\_Caldiarchaeum\_subterraneum  
MRVRIYPLALAKVVKHAASSLQREVAGLLVGKSAGKVL EIWDAVTGEQYGT PAYVQLDEMVMKVAEELS  
KSDKNLYIVGWYHSHPGLDVFLSPTDIDTQKRYQAMFSKAVALVDDPVDYAKTRRISLKFQVFQISKEG  
RVVSLPVSIGVHRAKLESTFHALSTFDFMHILGESSGKTRDKPLSEEQESLLGKAKKLF GA

>557694900\_Candidatus\_Caldiarchaeum\_subterraneum  
MRVRIYPLALAKVVKHAASSLQREVAGLLVGKSAGKVL EIWDAVTGEQYGT PAYVQLDEMVMKVAEELS  
KSDKNLYIVGWYHSHPGLDVFLSPTDIDTQKRYQAMFSKAVALVDDPVDYAKTRRISLKFQVFQISKEG  
RVVSLPVSIGVHRAKLESTFHALSTFDFMHILGESSGKTRDKPLSEEQESLLGKAKKLF GA

>2265088697\_candidate\_division\_pSL4\_archaeon\_JGI\_0000001-A7\_GBS-A\_001\_112  
MITQVSEALARFSRIGAMVSFLGAIHLSLLL TWFSINYDNVGRSLISGY  
TFSEPLIISLVAGGIAGVAGILASSLRQISKIRVVLPTLSFTSAGLALFS  
PLYTYLVKLP SFQLSYTPEFGMFGALITGVAITGSAVLATVASIRTKSTV  
YLGPPPPWATQELELARGPGE GVEGQEVQVPEVWEETTRVETTQPMPSQ  
PSSQAPTGGNCLICGDTIPSGDLATCKGCGATFHKDCMNVWIDLGNRCPS  
CNAELTS

>2527530172\_candidate\_division\_pSL4\_archaeon\_SCGC\_AAA471-E14\_Combined\_Assembly\_p  
SL4\_3\_pSL4  
MITQVSEALARFSRIGAMVSFLGAIHLSLLL TWFSINYDNVGRSLISGY  
TFSEPLIISLVAGGIAGVAGILASSLRQISKIRVVLPTLSFTSAGLALFS  
PLYTYLVKLP SFQLSYTPEFGMFGALITGVAITGSAVLATVASIRTKSTV  
YLGPPPPWATQELELARGPGE GVEGQEVQVPEVWEETTRVETTQPMPSQ  
PSSQAPTGGNCLICGDTIPSGDLATCKGCGATFHKDCMNVWIDLGNRCPS  
CNAELTS

>2265091066\_candidate\_division\_pSL4\_archaeon\_SCGC\_AAA471-G05\_GBS-N\_001\_14  
MLVMGTDVRDALVRLIRIGALISVLGAIHVLTLM LDWASLLNDNVVVRGI  
QGFVLNWSFTLSLLAGLLAGGAGVLASLSSNVRMLRFAVPSLAIAGSALA  
ILSPLYVLLHHLPSLNIQFRPEVGAI AALFTGVAMAGGGFISAMIGFVVL  
RPSSGPSAPPAIAYAPVQTPVIEAQQEIALGYE EPPSLSHEEEVFEEILRQ  
EEASIRAAAQPVPAEGTSPAPTTVPPQRPTAAQ ECAICGEPISNSLRF  
CNTCGAPMHRECVETWRD IGGKPCSCGTPLV

>2527526036\_candidate\_division\_pSL4\_archaeon\_SCGC\_AAA471-B22\_Combined\_Assembly\_p  
SL4\_1\_pSL4  
MLVMGTDVRDALVRLIRIGALISVLGAIHVLTLM LDWASLLNDNVVVRGI  
QGFVLNWSFTLSLLAGLLAGGAGVLASLSSNVRMLRFAVPSLAIAGSALA  
ILSPLYVLLHHLPSLNIQFRPEVGAI AALFTGVAMAGGGFISAMIGFVVL

RPSSGSPAPPAAIAYAPVQTPVIEAQQEIALGYEEPSLSHEEEVFEEILRQ  
EEASIRAAAQPVPAEGTSPAPTTVPPQRPQTAAQCAICGEPISNSLRF  
CNTCGAPMHRECVETWRDIGGKCPSCGTPLV

>2265089058\_candidate\_division\_pSL4\_archaeon\_JGI\_0000001-B8\_GBS-A\_001\_113  
VRRFRTPVVVEGRKAGEWFWGVICDSCLEIDPSHTTTKCPHCGATFHSF  
CYTAILSSKGRCPKCKMELA

>2527529566\_candidate\_division\_pSL4\_archaeon\_SCGC\_AAA471-D15\_Combined\_Assembly\_p  
SL4\_2\_\_pSL4  
VRRFRTPVVVEGRKAGEWFWGVICDSCLEIDPSHTTTKCPHCGATFHSF  
CYTAILSSKGRCPKCKMELA

>2265087851\_candidate\_division\_pSL4\_archaeon\_SCGC\_AAA471-E14\_GBS-N\_001\_10  
VLKVRSGRVLGRWEWGQPMCDACLEIEEGVEPLKCENCGANFHPDCYTS  
LKNTKAVCPKCKVTLE

>2265088700\_candidate\_division\_pSL4\_archaeon\_JGI\_0000001-A7\_GBS-A\_001\_112  
VLKVRSGRVLGRWEWGQPMCDACLEIEEGVEPLKCENCGANFHPDCYTS  
LKNTKAVCPKCKVTLE

>2527530169\_candidate\_division\_pSL4\_archaeon\_SCGC\_AAA471-E14\_Combined\_Assembly\_p  
SL4\_3\_\_pSL4  
VLKVRSGRVLGRWEWGQPMCDACLEIEEGVEPLKCENCGANFHPDCYTS  
LKNTKAVCPKCKVTLE

\*\*\*\*\*RINGv\*\*\*\*\*

>516675795\_MULTISPECIES\_hypothetical\_protein\_Archaea  
MDNCCKYCLEDSKESEHPLIYPCQCADGVHPNCLAIWLLVRPDSNDRRCRCEICHVNYIGVFIPPSTPPPP  
PSPLLQPLSDEEEDDVVVAVPPPPPPQPRLQQRNNVLDLDFICQCQGLEAGSYILGTILGLSGSILTTQP  
GYNHRSDIDIAFKVFIGLCISLYLMGLICTSRRCYKRCINGRRVYDNGGV

>516676027\_hypothetical\_protein\_Marine\_Group\_II\_euryarchaeote\_SCGC\_AB-629-J06  
MENVKECRICMTEGSEESLIQPCRCNTAYVHESCLQKWRSENTDNEKYRKCEICQADYVILQDHPKETFK  
IYAKKIKGCPLFCMYTIYLFIGSFATTLIDTFSNQQLVILNGGNTNITLGDIDDDIDSLSWFIYYLSYT  
SYIYGMIFFFVIFFFGLISSVHRKQFYIKRTRCTFSAYFIMSWTYFYNFYIFYKTMHRLDLYMAASLASIP  
INFFIMKRVAQIHDNIIRELNTNNVETIISVRYNPLIEITTIIEDEAEN

\*\*\*\*\*ThiF\*\*\*\*\*

>315425344\_Candidatus\_Caldiarchaeum\_subterraneum  
MKVRALTTE TVSLSFEEIKRYGRHLI IPEVGMAGQKLLKAAKVLVVGAGGLGSPISLYLAAAGVGKIGLV  
DFDLVDES NLQRQVLYTTRDVKRPKLEVAKERL TALNPHIEVETYETRLT SENALDIIKDYDIVVDGTDN  
FPTRYLVNDACVLLGKPNVYGSIFRFDGQVSVFDARRGPCYRCLYPEPPPPGLVPSCAEGGVLGVLPGVI  
GALQAMETIKLIIGIGEPLVGRLLLFDGLHMSFTELKLRKDPNCVICGPNPRIRELIDYEAFCGVTPSAD  
TSMHITPEELHEKLQKGEKVFLLDVREPVEYEICHLENALLIPLSKLPEHVNKLSLTDEIVAYCHTGVR  
SMAVKLLRDLGFRRVRNLAGGIDAWAERIDPSMPRY

>343485333\_Candidatus\_Caldiarchaeum\_subterraneum  
MKVRALTTE TVSLSFEEIKRYGRHLI IPEVGMAGQKLLKAAKVLVVGAGGLGSPISLYLAAAGVGKIGLV  
DFDLVDES NLQRQVLYTTRDVKRPKLEVAKERL TALNPHIEVETYETRLT SENALDIIKDYDIVVDGTDN  
FPTRYLVNDACVLLGKPNVYGSIFRFDGQVSVFDARRGPCYRCLYPEPPPPGLVPSCAEGGVLGVLPGVI  
GALQAMETIKLIIGIGEPLVGRLLLFDGLHMSFTELKLRKDPNCVICGPNPRIRELIDYEAFCGVTPSAD  
TSMHITPEELHEKLQKGEKVFLLDVREPVEYEICHLENALLIPLSKLPEHVNKLSLTDEIVAYCHTGVR  
SMAVKLLRDLGFRRVRNLAGGIDAWAERIDPSMPRY

>526886305\_Candidatus\_Caldiarchaeum\_subterraneum  
MKVRALTTE TVSLSFEEIKRYGRHLI IPEVGMAGQKLLKAAKVLVVGAGGLGSPISLYLAAAGVGKIGLV  
DFDLVDES NLQRQVLYTTRDVKRPKLEVAKERL TALNPHIEVETYETRLT SENALDIIKDYDIVVDGTDN  
FPTRYLVNDACVLLGKPNVYGSIFRFDGQVSVFDARRGPCYRCLYPEPPPPGLVPSCAEGGVLGVLPGVI

GALQAMETIKLIIGIGEPLVGRLLLFDGLHMSFTELKLRKDPNCVICGPNPRIRELIDYEAFCGVTPSAD  
TSMHITPEELHEKLRKQGEKVFLLDVREPVEYEICHLLENALLIPLSKLPEHVNKLSLTDEIVAYCHTGVRS  
SMAVKLLRDLGFRRVRNLAGGIDAWAERIDPSMPRY

>557694563\_Candidatus\_Caldiarchaum\_subterraneum  
MKVRALTETVSLSFEEIKRYGRHLIPEVGMAGQKLLKAAKVLVVGAGGLGSPISLYLAAAGVGKIGLV  
DFDLVDESNLQRQVLYTTRDVKRPKLEVAKERLTALNPHIEVETYETRLTSENALDIIKDYDIVVDGTDN  
FPTRYLVNDACVLLGKPNVYGSIFRFDGQVSVFDARRGPCYRCLYPEPPPPGLVPSCAEGGVLGVLPGVI  
GALQAMETIKLIIGIGEPLVGRLLLFDGLHMSFTELKLRKDPNCVICGPNPRIRELIDYEAFCGVTPSAD  
TSMHITPEELHEKLRKQGEKVFLLDVREPVEYEICHLLENALLIPLSKLPEHVNKLSLTDEIVAYCHTGVRS  
SMAVKLLRDLGFRRVRNLAGGIDAWAERIDPSMPRY

>519109680\_Aigarchaeota\_archaeon\_SCGC\_AAA471-G05  
MGKALDEGLRERYDRQMRIEGWDQHLVSGSSVLIAGVGALGCEVAKNLALSGVGRLVLDVDRDVELSNLN  
RQMLFDESIGLRKAEVAAAKLRAMNPHVRVESYASDLREVPEEVEFESVDVICSLDSWGIRRWLNSVAV  
LKRKPLVDGAIIEGMVGNVQVVIPGRTACLECHGTTLIPQEERLAECTLRRRRPEELLEDLKAQGVESLE  
EARTLFRYNLKTVFDLKYTPPESVPDQGVRELLNSLRERLKPMPAVQSVSSVIAGIVSTEVLKLIHRGS  
IGKPLRGLLVYDASNSRFTRVPLKRMEGCIVCGQVDVSPPEVVVGDDGTVYRLKELIAERFGIPDAEVIH  
GTKVLGEDARLSSVLGPSGEGIVYVVTSTRRYEPLPLVVRLSDFKDPSLSGKGDIPREATGSG

>516975882\_candidate\_division\_YNPFFA  
MFNADEYYSRLYVLKNIGKEGINILKRKTAAVVGLGGLGSVIAYLLTSNGIGKIKLIDQDIVELSNINRQ  
FLYDINDLRYPKVEVAYKLLKDVNPEVKIEPIAENLNSDNAEEILGDVDIILDGLDNLKTRYIVNYIAVK  
KKIPYVFGSVLEETGNVSVFYPPETPCLNCIFEEINDSELPCTETVGIINTATSLVASIEVNEAIKLLIN  
KSSNLLSKLLIDLGNLIFDFIDIFKNENCKVCNNILSYKPKKIELIWQCGRDIVNINPRKKVNMMLNNI  
KEKIEKYFKIILVSDFIIVFKYEDKEISIFKNGRMLIKNVKNEEEAKNVYEKIDKLINI

>2265088526\_candidate\_division\_pSL4\_archaeon\_JGI\_0000001A7\_GBSA\_001\_112  
VVGLTERQVLNPLDHVSLTMQEIIRRYGRHLIMPEVGMTGQKRLKAARVLV  
VGTGGLGAPVSLYLAAGVGTIGLVDFDEVDENLQRQVIFTTEDVGEKK  
VEVAKRRLSLNPYIKVETYGEAINSONALEIIGEYDVVVDATDNFPTRY  
LLNDACVFLKKPLVYGSIFRFDGQLSVFYAGHGPCYRCLYPEPPPPGLVP  
SCAEGGVLGVLPGIVGSLQANEALKLILGVGQPLIGRLLLIDALSTGFRE  
LHVQRDKNCPVCGENPTIRELIDYEQFCGVRITGEDPSSRATSIAPEQLK  
EMLDRGEEIQLIDVREPVEWEICRLPGARLIPLGQLTSRLHEIDQTKKVI  
VYCHSGQRSALAVKLLRDLGLTNTFNLAGGIDAYAERIDQSIIPRY

>2265088061\_candidate\_division\_pSL4\_archaeon\_SCGC\_AAA471E14\_GBSN\_001\_10  
MKQLERYERQIRIDGWDQEKLF SATV FVAGVGALGCEVAKNLAMMGVGR  
MIADYDRVELSNLSRQLLFRSDIGRGAEEAAERLREINPHVEVEAFEG  
DIRELGEETYRKADVLLSCLDNWASRRWYNSMAVYLGKPLVDGAMNGFYG  
NVQIVLPGRTACLEQSSLLIPREERAAECTLRRRRPQDLVDELKQHGLS  
ITLEEAENLFKLNIKTVDLKYFRPEKSNQEISEETLRLIDGLRASLVPR  
MPALQSVAAATIAGIVSTHTLQILHGGSLGAVPTSLIVYDGLNSRLTRVKI  
KRDPMCIVCGENEGEPITLRFDTSTRVYEFKEVIASKLGLPDPEILYISR  
RLDDSQTLESAGVKNGDVVYVSTTRLYEPLAIKVVADEGDTASLG

>2265090260\_candidate\_division\_pSL4\_archaeon\_SCGC\_AAA471F17\_GBSN\_001\_13  
LGKALDEGLRERYDRQMRIEGWDQHLVSGSSVLIAGVGALGCEVAKNLAL  
SGVGRLVLDVDRDVELSNLNQMLFDESIGLRKAEVAAAKLRAMNPHVR  
VESYASDLREVPEEVEFESVDVICSLDSWGIRRWLNSVAVLKRKPLVDGA  
IEGMVGNVQVVIPGRTACLECHGTTLIPQEERLAECTLRRRRPEELLEDL  
RAQGVESLEEARTLFRYNLKTVFDLKYTPPESVPDQGVRELLNSLRERL  
KPKMPAVQSVSSVIAGIVSTEVLKLIHRGSIGKPLRGLLVYDASNSRFTR  
VPLKRMEGCIVCGQVDVSPPEVVVGDDGTVYRLKELIAERFGIPDAEVIH  
GTKVLGEDVRLSSVLGPSGEGIVYVVTSTRRYEPLPLVVRLSDFKDPSLSG  
KGDIPREATGSG

>2265090995\_candidate\_division\_pSL4\_archaeon\_SCGC\_AAA471G05\_GBSN\_001\_14  
LGKALDEGLRERYDRQMRIEGWDQHLVSGSSVLIAGVGALGCEVAKNLAL  
SGVGRLVLDVDRDVELSNLNQMLFDESIGLRKAEVAAAKLRAMNPHVR  
VESYASDLREVPEEVEFESVDVICSLDSWGIRRWLNSVAVLKRKPLVDGA

IEGMVGNVQVVIPGRTACLECHGTTLIPQEERLAECTLRRRRPEELLEDL  
KAQGVEVSL EEARTLFRYNLKTVFDLKYTPPESVDPDQGVRELLNSLRERL  
KPKMPAVQSVSSVIAGIVSTEVLKLIHRGSIGKPLRGLLVYDASNSRFTR  
VPLKRMEGCIVCGQVDVSPPEVVVGDDGTVYRLKELIAERFGIPDAEVIH  
GTKVLGEDARLSSVLGPSGEGIVYVVTSTRRYEPLPLVVRLSDFKDPSLSG  
KGDIPREATGSG

>2265092360\_candidate\_division\_pSL4\_archaeon\_SCGC\_AAA471J08\_GBSN\_001\_19  
LGKALDEGLRERYDRQMRIEGWDQHLVSGSSVL IAGVGALGCEVAKNLAL  
SGVGRLVLVDRDVELSNLNRQMLFDESIGLRKAEVAAAKLRAMNPHVR  
VESYASDLREVPEEFESVDVICSLDSWGIRRWLNSVAVLKRKPLVDGA  
IEGMVGNVQVVIPGRTACLECHGTTLIPQEERLAECTLRRRRPEELLEDL  
RAQGVEVSL EEARTLFRYNLKTVFDLKYTPPESVDPDQGVRELLNSLRERL  
KPKMPAVQSVSSVIAGIVSTEVLKLIHRGSIGKPLRGLLVYDASNSRFTR  
VPLKRMEGCIVCGQVDVSPPEVVVGDDGTVYRLKELIAERFGIPDAEVIH  
GTKVLGEDARLSSVLGPSGEGIVYVVTSTRRYEPLPLVVRLSDFKDPSLSG  
KGDIPREATGSG

>2265094365\_candidate\_division\_pSL4\_archaeon\_SCGC\_AAA471D15\_GBSN\_001\_9  
LGGALDDVLRERYDRQIRIEGWDQQLVSGSSVL IAGVGALGCEVAKNLAL  
SGVGRLVLVDRDVELSNLNRQMLFDESIGLRKAEVAAAKLRAMNPYIR  
VESYASDLREVPEEFESVDVICSLDSWGIRRWLNSVAVLKRKPLVDGA  
IEGMVGNVQVVIPGRTACLECHGTTLIPQEERLAECTLRRRRPEELMEDL  
RAQGVEISLEEARALFRYNLKTVFDLKYTPPESIPDQGVRELLNSLRERL  
KPKMPAVQSVSSVIAGIVSTEVLKLIHRGSIGKPLRGLLVYDASNSRFTR  
VPLKRMEGCIVCGQVDVSPPEVVVGDDGTVYRLKELIAERFGIPDAEVIY  
GTRVLGEDVQLSSVLGPSGEGVVYVVTSTRRYEPLPLKVRLHSSTGSSLSG  
KGDIPREGTGSG

>2527526327\_candidate\_division\_pSL4\_archaeon\_SCGC\_AAA471B22\_Combined\_Assembly\_pS  
L4\_1\_\_pSL4  
LLKNASVMVGGAGALGNEI IKNLVMLGFGTIYVDFDFTVVRSNLNRVLY  
RTIDAELKTFKAEAI AKRAKEIDPYRYIEIPIVEEIGPQGINYRNRLFT  
EKNIXLIFGAFDNVASRIHMTTIAYYHGIPYVDGGMWXIGNVFVMNPPX  
TACYVCSLSEESWTEMLKRLQCSMKGTLESMEMPSLPTTSSIVAAIQVQE  
ALKILFSKRNPGGSSLGVP SLGKMISFNLITNDWIVYEVKRPDCPVCSN  
VGRG

>2527529149\_candidate\_division\_pSL4\_archaeon\_SCGC\_AAA471D15\_Combined\_Assembly\_pS  
L4\_2\_\_pSL4  
LGGALDDVLRERYDRQIRIEGWDQQLVSGSSVL IAGVGALGCEVAKNLAL  
SGVGRLVLVDRDVELSNLNRQMLFDESIGLRKAEVAAAKLRAMNPYIR  
VESYASDLREVPEEFESVDVICSLDSWGIRRWLNSVAVLKRKPLVDGA  
IEGMVGNVQVVIPGRTACLECHGTTLIPQEERLAECTLRRRRPEELMEDL  
RAQGVEISLEEARALFRYNLKTVFDLKYTPPESIPDQGVRELLNSLRERL  
KPKMPAVQSVSSVIAGIVSTEVLKLIHRGSIGKPLRGLLVYDASNSRFTR  
VPLKRMEGCIVCGQVDVSPPEVVVGDDGTVYRLKELIAERFGIPDAEVIY  
GTRVLGEDVQLSSVLGPSGEGVVYVVTSTRRYEPLPLKVRLHSSTGSSLSG  
KGDIPREGTGSG

>2527530458\_candidate\_division\_pSL4\_archaeon\_SCGC\_AAA471E14\_Combined\_Assembly\_pS  
L4\_3\_\_pSL4  
VVGLTERQVLNPLDHVSLTMQEIRRYGRHLIMPEVGMTGQKRLKAARVLV  
VGTGGLGAPVSLYLAAGVGTIGLVDFDEVDETNLQRQVIFTTEDVGEKK  
VEVAKRRLSLNPYIKVETYGEAINSONALEIIGEYDVVVDATDNFPTRY  
LLNDACVFLKKPLVYGSIFRFDGQLSVFYAGHGPCYRCLYPEPPPPGLVP  
SCAEGGVLGVLPGIVGSLQANEALKLILGVGQPLIGRLLLIDALSTGFRE  
LHVQRDKNCPVCGENPTIRELIDYEQFCGVRITGEDPSSRATSIAPEQLK  
EMLDRGEEIQLIDVREPVEWEICRLPGARLIPLGQLTSRLHEIDQTKKVI  
VYCHSGQRSALAVKLLRDLGLTNTFNLAGGIDAYAERIDQSIIPRY

>2264867790\_candidate\_division\_YNPFFA\_archaeon\_SCGC\_AAA471008\_GBSN\_001\_29

MFNADEYYSRLYVLKNIGKEGINILKRKTAAVVGLGGLGSVIAYLLTSNG  
IGKIKLIDQDVELSNINRQFLYDINDLRYPKVEVAYKKLKDVNPEVKIE  
PIAENLNSDNAEEILGDVDIILDGLDNLKTRYIVNYIAVKKKIPYVFGSV  
LEYTGNVSVFYPPETPCLNCIFEEINDSELPTCETVGIINTATSLVASIE  
VNEAIKLLINKSSNLLSKLLIDLGNLIFDFIDIFKNENCKVCNNILSYK  
PKKIELIWQCGRDIVNINPRKKVNMMLNNIIEKIEKYFKIILVSDFIIVF  
KYEDKEISIFKNGRMLIKNVKNEEEAKNVYEKIDKLINI

>2264869056\_candidate\_division\_YNPFFA\_archaeon\_SCGC\_AAA471B05\_GBSN\_001\_2

MFNADEYYSRLYVLKNIGKEGINILKRKTAAVVGLGGLGSVIAYLLTSNG  
IGKIKLIDQDVELSNINRQFLYDINDLRYPKVEVAYKKLKDVNPEVKIE  
PIAENLNSDNAEEILGDVDIILDGLDNLKTRYIVNYIAVKKKIPYVFGSV  
LEYTGNVSVFYPPETPCLNCIFEEINDSELPTCETVGIINTATSLVASIE  
VNEAIKLLINKSSNLLSKLLIDLGNLIFDFIDIFKNENCKVCNNILSYK  
PKKIELIWQCGRDIVNINPRKKVNMMLNNIIEKIEKYFKIILVSDFIIVF  
KYEDKEISIFKNGRMLIKNVKNEEEAKNVYEKIDKLINI

>2265120287\_candidate\_division\_YNPFFA\_archaeon\_SCGC\_AAA471L13\_GBSN\_001\_22

MFNADEYYSRLYVLKNIGKEGINILKRKTAAVVGLGGLGSVIAYLLTSNG  
IGKIKLIDQDVELSNINRQFLYDINDLRYPKVEVAYKKLKDVNPEVKIE  
PIAENLNSDNAEEILGDVDIILDGLDNLKTRYIVNYIAVKKKIPYVFGSV  
LEYTGNVSVFYPPETPCLNCIFEEINDSELPTCETVGIINTATSLVASIE  
VNEAIKLLINKSSNLLSKLLIDLGNLIFDFIDIFKNENCKVCNNILSYK  
PKKIELIWQCGRDIVNINPRKKVNMMLNNIIEKIEKYFKIILVSDFIIVF  
KYEDKEISIFKNGRMLIKNVKNEEEAKNVYEKIDKLINI

>2265121764\_candidate\_division\_YNPFFA\_archaeon\_SCGC\_AAA471L14\_GBSN\_001\_23

MFNADEYYSRLYVLKNIGKEGINILKRKTAAVVGLGGLGSVIAYLLTSNG  
IGKIKLIDQDVELSNINRQFLYDINDLRYPKVEVAYKKLKDVNPEVKIE  
PIAENLNSDNAEEILGDVDIILDGLDNLKTRYIVNYIAVKKKIPYVFGSV  
LEYTGNVSVFYPPETPCLNCIFEEINDSELPTCETVGIINTATSLVASIE  
VNEAIKLLINKSSNLLSKLLIDLGNLIFDFIDIFKNENCKVCNNILSYK  
PKKIELIWQCGRDIVNINPRKKVNMMLNNIIEKIEKYFKIILVSDFIIVF  
KYEDKEISIFKNGRMLIKNVKNEEEAKNVYEKIDKLINI

>2527532002\_candidate\_division\_YNPFFA\_archaeon\_SCGC\_AAA471B05\_Combined\_Assembly\_  
YNPFFA\_1\_\_YNPFFA

MFNADEYYSRLYVLKNIGKEGINILKRKTAAVVGLGGLGSVIAYLLTSNG  
IGKIKLIDQDVELSNINRQFLYDINDLRYPKVEVAYKKLKDVNPEVKIE  
PIAENLNSDNAEEILGDVDIILDGLDNLKTRYIVNYIAVKKKIPYVFGSV  
LEYTGNVSVFYPPETPCLNCIFEEINDSELPTCETVGIINTATSLVASIE  
VNEAIKLLINKSSNLLSKLLIDLGNLIFDFIDIFKNENCKVCNNILSYK  
PKKIELIWQCGRDIVNINPRKKVNMMLNNIIEKIEKYFKIILVSDFIIVF  
KYEDKEISIFKNGRMLIKNVKNEEEAKNVYEKIDKLINI

\*\*\*\*\*UCH\*\*\*\*\*

>516675686\_Marine\_Group\_II\_euryarchaeote\_SCGC\_AB-629-J06

MADKYKDKGLTGLANLGNTECFMNTTLQCLSHYTSFNDFLQHGTYKQKIKKKPESLVLMEWDKLRMLMVSE  
NCIISPGGFLTSVQKVAKIKEKHLFTGFAQNDLPEFLTFIIDCFHTAIMREVMKIKGNILTDKDKVAKK  
CFDMMKNMYKKEYSEILDIFYGIHVSCVKGEDGDTLSCNPEPFLMLDLVPPDKRNVSLINCFDEYTKKEV  
LDDDNQYINDEGKKVAKQIEFWKFPDVLIVTLKRFTNSIRKNQCLVDFPFDNLDLSKYVVGYDPHSFNY  
ELYGICNHSGGVMGGHYAYVKNANNKWYDFNDARVQEIKEADLKTYPAYCFFYRKKK

\*\*\*\*\*UQ\_con\*\*\*\*\*

>2265088662\_candidate\_division\_pSL4\_archaeon\_JGI\_0000001-A7\_GBS-A\_001\_112

MHVPEAGYLPEPRWAKRLAQEYQLMKNYEPTFDAKDGDLDLTHYKGTIIGTG  
IFEGGVFVVEILLPREFPFVPPQVVWHTRIWHNPFTDEVPARVCEISIFNK  
DWFPMHVVSVIEALKNLLANPNPDDPLNVWAAYEMKYPERFVARVREY

IRLYATPEKALSLL

>2265090259\_candidate\_division\_pSL4\_archaeon\_SCGC\_AAA471-F17\_GBS-N\_001\_13  
LQREVQEQIGFLPEQLWFKRLALEYQLIRNYEPTFDAVDGDLTHYKGVIV  
GTGYEYEGGFFLVEIFLDRTPPYTPPRVWHTRIWHPNFTDESPARICESI  
LTKDWEPNTNVIAVIEALKNLLSNPNPDDPLNAWAAYEMKNSFHTFLARV  
RQYIELYASPEKVLRRQ

>2265090996\_candidate\_division\_pSL4\_archaeon\_SCGC\_AAA471-G05\_GBS-N\_001\_14  
LQREVQEQIGFLPEQLWFKRLALEYQLIRNYEPTFDAVDGDLTHYKGVIV  
GTGYEYEGGFFLVEIFLDRTPPYTPPRVWHTRIWHPNFTDESPARICESI  
LTKDWEPNTNVIAVIEALKNLLSNPNPDDPLNAWAAYEMKNSFHTFLARV  
RQYIELYASPEKVLRRQ

>2265092361\_candidate\_division\_pSL4\_archaeon\_SCGC\_AAA471-J08\_GBS-N\_001\_19  
LQREVQEQIGFLPEQLWFKRLALEYQLIRNYEPTFDAVDGDLTHYKGVIV  
GTGYEYEGGFFLVEIFLDRTPPYTPPRVWHTRIWHPNFTDESPARICESI  
LTKDWEPNTNVIAVIEALKNLLSNPNPDDPLNAWAAYEMKNSFHTFLARV  
RQYIELYASPEKVLRRQ

>2265094366\_candidate\_division\_pSL4\_archaeon\_SCGC\_AAA471-D15\_GBS-N\_001\_9  
LQREVQEQIGFLPEQLWFKRLALEYQLIRNYEPTFDAVDGDLTHYKGVIV  
GTGYEYEGGFFLVEIFLDRTPPYTPPRVWHTRIWHPNFTDESPARICESI  
LTKDWEPNTNVIAVIEALKNLLSNPNPDDPLNAWAAYEMKNSFHTFLARV  
RQYIELYASPEKVLRRQ

>2527529148\_candidate\_division\_pSL4\_archaeon\_SCGC\_AAA471-D15\_Combined\_Assembly\_p  
SL4\_2\_\_pSL4  
LQREVQEQIGFLPEQLWFKRLALEYQLIRNYEPTFDAVDGDLTHYKGVIV  
GTGYEYEGGFFLVEIFLDRTPPYTPPRVWHTRIWHPNFTDESPARICESI  
LTKDWEPNTNVIAVIEALKNLLSNPNPDDPLNAWAAYEMKNSFHTFLARV  
RQYIELYASPEKVLRRQ

>2527525289\_candidate\_division\_pSL4\_archaeon\_SCGC\_AAA471-B22\_Combined\_Assembly\_p  
SL4\_1\_\_pSL4  
VDGDLTHYKGVIVGTGYEYEGGFFXVEIFLDRTPPYTPPRVWHTRIWHPN  
FTDESPARICESILTKDWEPNTNVIAVIEALKNLLSNPNPDDPLNAWAAY  
EMKNSFHTFLARVRQYIELYASPEKVLRRQ

>2265088060\_candidate\_division\_pSL4\_archaeon\_SCGC\_AAA471-E14\_GBS-N\_001\_10  
MHVPEAGYLPEPRWAKRLAQEYQLMKNYEPTFDAKDGDLDTHYKGTIIIGTG  
IXEGGVFVVEILLPREFPFVPPQVWHTRIWHPNFTDEVPARVCESIFNK  
DWFPNMHVSVIEALKNLLANPNPDDPLNVWAAYEMKYPERFVARVREY  
IRLYATPEKALSLL

>2527530434\_candidate\_division\_pSL4\_archaeon\_SCGC\_AAA471-E14\_Combined\_Assembly\_p  
SL4\_3\_\_pSL4  
MHVPEAGYLPEPRWAKRLAQEYQLMKNYEPTFDAKDGDLDTHYKGTIIIGTG  
IXEGGVFVVEILLPREFPFVPPQVWHTRIWHPNFTDEVPARVCESIFNK  
DWFPNMHVSVIEALKNLLANPNPDDPLNVWAAYEMKYPERFVARVREY  
IRLYATPEKALSLL

>516675903\_Marine\_Group\_II\_euryarchaeote\_SCGC\_AB-629-J06  
MSTAQRIAKELENLTADPPANCASAGPLEDDIFHWQATLMGPQDSPYEGGIFIMNIKFPDYPFKPPKVTF  
ETKIFHPNINSSGGICLDILKEAWSPALTIKSVLLSICSLLCDPNPDDPLVPDIARMYKHDRDKYNRTAQ  
LWTIQFAVSE

>315426917\_Candidatus\_Caldiarchaenum\_subterraneum  
MESQYVELPENAWYRRALALEYALIQENEPTFTPVENDLTHYEGVIVGSGEYEGGFFRVEIIIIPRSYPYFP  
PDVIWHTRIWHPNFSDSVPARVCESIFKDHWSPLRIVAVIESLRNLLTNPNEPDLNPVAAFEYKRNRPD  
LFYSRVRQFVETYATPEQAFGKKRWKGL

>315426998\_Candidatus\_Caldiarchaeum\_subterraneum  
MESQYVELPENAWYRRALALEYALIQENEPTFTPVENDLTHYEGVIVGSGEYEGGFFRVEIIIIPRSYPYFP  
PDVIWHTRIWHPNFSDSVPARVCE SIFKDHWSPLRIVAVIESLRNLLTNPNPEDPLNPVAAFEYKNRPD  
LFYSRVRQFVETYATPEQAFGKKRWKGL

>315428085\_Candidatus\_Caldiarchaeum\_subterraneum  
MESQYVELPENAWYRRALALEYALIQENEPTFTPVENDLTHYEGVIVGSGEYEGGFFRVEIIIIPRSYPYFP  
PDVIWHTRIWHPNFSDSVPARVCE SIFKDHWSPLRIVAVIESLRNLLTNPNPEDPLNPVAAFEYKNRPD  
LFYSRVRQFVETYATPEQAFGKKRWKGL

>343485672\_Candidatus\_Caldiarchaeum\_subterraneum  
MESQYVELPENAWYRRALALEYALIQENEPTFTPVENDLTHYEGVIVGSGEYEGGFFRVEIIIIPRSYPYFP  
PDVIWHTRIWHPNFSDSVPARVCE SIFKDHWSPLRIVAVIESLRNLLTNPNPEDPLNPVAAFEYKNRPD  
LFYSRVRQFVETYATPEQAFGKKRWKGL

>526887490\_Candidatus\_Caldiarchaeum\_subterraneum  
MESQYVELPENAWYRRALALEYALIQENEPTFTPVENDLTHYEGVIVGSGEYEGGFFRVEIIIIPRSYPYFP  
PDVIWHTRIWHPNFSDSVPARVCE SIFKDHWSPLRIVAVIESLRNLLTNPNPEDPLNPVAAFEYKNRPD  
LFYSRVRQFVETYATPEQAFGKKRWKGL

>557694902\_Candidatus\_Caldiarchaeum\_subterraneum  
MESQYVELPENAWYRRALALEYALIQENEPTFTPVENDLTHYEGVIVGSGEYEGGFFRVEIIIIPRSYPYFP  
PDVIWHTRIWHPNFSDSVPARVCE SIFKDHWSPLRIVAVIESLRNLLTNPNPEDPLNPVAAFEYKNRPD  
LFYSRVRQFVETYATPEQAFGKKRWKGL

>516675970\_Marine\_Group\_II\_euryarchaeote\_SCGC\_AB-629-J06  
MSSSSKFMPPKNQKRLLRDVRLLIKSPLTSNGIYYSHDEDNMLKGYAVIFGPDDSLYRYGAYMFEFNPT  
EYPFVPPKLTYL TNDGKTRFNPNLYRNGKVCISLLNTWKGEQWTSQOTIESILLSLVALLHNEPLLNEPG  
IKKTHRDFKSYNSIIQYKNYETAILGILTQKILPSTFSGFFPIIKKHFKHEKFI LAELAQLQSKKNRQ  
EFKTSLYNMNISANYTDLMEKMKIAFKEFLN

>519109681\_Aigarchaeota\_archaeon\_SCGC\_AAA471-G05  
MQREVQEQIGFLPEQLWFKRLALEYQLIRNYEPTFDAVDGDLTHYKGVIVGTGYEYEGGFFLVEIFLDRTF  
PYTPPRVWHTRIWHPNFTDESPARICESILT KDWEPTNVI AVIEALKNLLSNPNPDDPLNAWAAYEMK  
NSFHTFLARVRQYIELYASPEKVL RQG

>518007549\_Methanomassiliicoccus\_luminyensis  
MPLPADILVIRLRNELSACRSYIRDMPDL SAPSRVRFVVEVEVELAKVPGPIIEEGKVGSTYLHRFSISI  
GKNYPFEKPTVRWMSPIFHPNIMPPDDGGHVCTKLL EEWGFNSTLISFIKGVESLVMNPNPASPFGTDSC  
TAAAEHFNCAEVKLPMLKPPAPRVVRP

\*\*\*\*\*ubiquitin\*\*\*\*\*

>2265090997\_candidate\_division\_pSL4\_archaeon\_SCGC\_AAA471-G05\_GBS-N\_001\_14  
MKVRIVPAVGGGPPLEIDVPPSTTIGAIKLRVCAMKKLRPDDTRLTYKNR  
ALADTETLESAGVSDGDKLVLVTRTVGG

>2265092362\_candidate\_division\_pSL4\_archaeon\_SCGC\_AAA471-J08\_GBS-N\_001\_19  
MKVRIVPAVGGGPPLEIDVPPSTTIGAIKLRVCAMKKLRPDDTRLTYKNR  
ALADTETLESAGVSDGDKLVLVTRTVGG

>2265090258\_candidate\_division\_pSL4\_archaeon\_SCGC\_AAA471-F17\_GBS-N\_001\_13  
MKVRIVPAVGGGPPLEIDVPPSTTIGAIKLRVCAMKKLRPDDTRLTYKNR  
ALADTETLESAGVSEGDKLVTVTRTVGG

>2265094367\_candidate\_division\_pSL4\_archaeon\_SCGC\_AAA471-D15\_GBS-N\_001\_9  
MKVRIVPAVGGGPPLEIDVPPSTTIGAIKLRVCAMKKLRPDDTRLTYKNR  
ALADTETLESAGVSEGDKLVTVTRTVGG

>2527525290\_candidate\_division\_pSL4\_archaeon\_SCGC\_AAA471-B22\_Combined\_Assembly\_p  
SL4\_1\_pSL4

MKVRIVPAVGGPPLEIDVPPSTTIGAIKLRVCAMKKLRPDDTRLTYKNR  
ALADTETLESAGVSEGDKLVLVTRTVGG

>2527529147\_candidate\_division\_pSL4\_archaeon\_SCGC\_AAA471-D15\_Combined\_Assembly\_p  
SL4\_2\_pSL4

MKVRIVPAVGGPPLEIDVPPSTTIGAIKLRVCAMKKLRPDDTRLTYKNR  
ALADTETLESAGVSEGDKLVLVTRTVGG

>2265088059\_candidate\_division\_pSL4\_archaeon\_SCGC\_AAA471-E14\_GBS-N\_001\_10

MKIRVVPAVGGPPLELDVPPNASIGAVKMRVCTIKKLRPEDARLTYKGR  
ALGDNETLASAGVVEGDKLVLITRTVGG

>2265088663\_candidate\_division\_pSL4\_archaeon\_JGI\_0000001-A7\_GBS-A\_001\_112

MKIRVVPAVGGPPLELDVPPNASIGAVKMRVCTIKKLRPEDARLTYKGR  
ALGDNETLASAGVVEGDKLVLITRTVGG

>2527530435\_candidate\_division\_pSL4\_archaeon\_SCGC\_AAA471-E14\_Combined\_Assembly\_p  
SL4\_3\_pSL4

MKIRVVPAVGGPPLELDVPPNASIGAVKMRVCTIKKLRPEDARLTYKGR  
ALGDNETLASAGVVEGDKLVLITRTVGG

>2264867171\_candidate\_division\_YNPFFA\_archaeon\_SCGC\_AAA471-008\_GBS-N\_001\_29

MKVKINETFIFEEKPFFSLSKFWKKKIVTINIDNNSKIYEVKKAILKRYN  
LNNSIDLFKIVYKNKELNDNLSISELGIKENETLMIFCKNKKELEDILRK  
KNIL

>2264869028\_candidate\_division\_YNPFFA\_archaeon\_SCGC\_AAA471-B05\_GBS-N\_001\_2

MKVKINETFIFEEKPFFSLSKFWKKKIVTINIDNNSKIYEVKKAILKRYN  
LNNSIDLFKIVYKNKELNDNLSISELGIKENETLMIFCKNKKELEDILRK  
KNIL

>2264869402\_candidate\_division\_YNPFFA\_archaeon\_SCGC\_AAA471-B23\_GBS-N\_001\_5

MKVKINETFIFEEKPFFSLSKFWKKKIVTINIDNNSKIYEVKKAILKRYN  
LNNSIDLFKIVYKNKELNDNLSISELGIKENETLMIFCKNKKELEDILRK  
KNIL

>2264870547\_candidate\_division\_YNPFFA\_archaeon\_SCGC\_AAA471-C03\_GBS-N\_001\_6

MKVKINETFIFEEKPFFSLSKFWKKKIVTINIDNNSKIYEVKKAILKRYN  
LNNSIDLFKIVYKNKELNDNLSISELGIKENETLMIFCKNKKELEDILRK  
KNIL

>2265120433\_candidate\_division\_YNPFFA\_archaeon\_SCGC\_AAA471-L13\_GBS-N\_001\_22

MKVKINETFIFEEKPFFSLSKFWKKKIVTINIDNNSKIYEVKKAILKRYN  
LNNSIDLFKIVYKNKELNDNLSISELGIKENETLMIFCKNKKELEDILRK  
KNIL

>2265121746\_candidate\_division\_YNPFFA\_archaeon\_SCGC\_AAA471-L14\_GBS-N\_001\_23

MKVKINETFIFEEKPFFSLSKFWKKKIVTINIDNNSKIYEVKKAILKRYN  
LNNSIDLFKIVYKNKELNDNLSISELGIKENETLMIFCKNKKELEDILRK  
KNIL

>2527531181\_candidate\_division\_YNPFFA\_archaeon\_SCGC\_AAA471-B05\_Combined\_Assembly  
\_YNPFFA\_1\_YNPFFA

MKVKINETFIFEEKPFFSLSKFWKKKIVTINIDNNSKIYEVKKAILKRYN  
LNNSIDLFKIVYKNKELNDNLSISELGIKENETLMIFCKNKKELEDILRK  
KNIL

>315426918\_Candidatus\_Caldiarchaenum\_subterraneum

MKIKIVPAVGGSPLELEVAPNATVGAVRTKVCAMKKLRPDDTRLTYKGRALKDTETLES LGVADGDKFV  
LITRTVGGCGEPIRAA

>315426997\_Candidatus\_Caldiarchaenum\_subterraneum



MKIKIVPAVGGGSPLLEEVAPNATVGAVRTKVCAMKKLPPDTTRLTYKGRALKDTETLESLGVADGDKFV  
LITRTVGGCGEPIIRAA

>315428084\_Candidatus\_Caldiarchoeum\_subterraneum  
MKIKIVPAVGGGSPLLEEVAPNATVGAVRTKVCAMKKLPPDTTRLTYKGRALKDTETLESLGVADGDKFV  
LITRTVGGCGEPIIRAA

>343485671\_Candidatus\_Caldiarchoeum\_subterraneum  
MKIKIVPAVGGGSPLLEEVAPNATVGAVRTKVCAMKKLPPDTTRLTYKGRALKDTETLESLGVADGDKFV  
LITRTVGGCGEPIIRAA

>526887489\_Candidatus\_Caldiarchoeum\_subterraneum  
MKIKIVPAVGGGSPLLEEVAPNATVGAVRTKVCAMKKLPPDTTRLTYKGRALKDTETLESLGVADGDKFV  
LITRTVGGCGEPIIRAA

>557694901\_Candidatus\_Caldiarchoeum\_subterraneum  
MKIKIVPAVGGGSPLLEEVAPNATVGAVRTKVCAMKKLPPDTTRLTYKGRALKDTETLESLGVADGDKFV  
LITRTVGGCGEPIIRAA

>519109682\_Aigarchaeota\_archaeon\_SCGC\_AAA471-G05  
MKVRIVPAVGGGPPLEIDVPPSTTIGAIKLRVCAMKKLRPDDTRLTYKNRALADTETLESAGVSDGDKLV  
LVTRTVGG

>516977482\_candidate\_division\_YNPFFA  
MKVKINETFIFEEKPFFSLSKFWKKKIVTINIDNNSKIYEVKKAILKRYNLNNSIDLFKIVYKNKELNDN  
LSISELGIKENETLMIFCKNKKLEEDILRKNIL

\*\*\*\*\*zf-RING\_2\*\*\*\*\*

>2265088697\_candidate\_division\_pSL4\_archaeon\_JGI\_0000001-A7\_GBS-A\_001\_112  
MITQVSEALARFSRIGAMVSFLGAIHLSLLL TWFSINYDNVGRSLISGY  
TFSEPLIISLVAGGIAGVAGILASSLRQISKIRVVLPTLSFTSAGLALFS  
PLYTYLVKLP SFQLSYTPEFGMFGALITGVAITGSAVLATVASIRTKSTV  
YLGPPPPWATQELELARGPGEGGVEGQEVQVPEVWEETTRVETTQPMPSQ  
PSSQAPTGGNCLICGDTIPSGDLATCKGCGATFHKDCMNVWIDLGNRCPS  
CNAELTS

>2527530172\_candidate\_division\_pSL4\_archaeon\_SCGC\_AAA471-E14\_Combined\_Assembly\_p  
SL4\_3\_pSL4  
MITQVSEALARFSRIGAMVSFLGAIHLSLLL TWFSINYDNVGRSLISGY  
TFSEPLIISLVAGGIAGVAGILASSLRQISKIRVVLPTLSFTSAGLALFS  
PLYTYLVKLP SFQLSYTPEFGMFGALITGVAITGSAVLATVASIRTKSTV  
YLGPPPPWATQELELARGPGEGGVEGQEVQVPEVWEETTRVETTQPMPSQ  
PSSQAPTGGNCLICGDTIPSGDLATCKGCGATFHKDCMNVWIDLGNRCPS  
CNAELTS

>2265091066\_candidate\_division\_pSL4\_archaeon\_SCGC\_AAA471-G05\_GBS-N\_001\_14  
MLVMGTDVRDALVRLIRIGALISVLGAIHVLTLMLDWASLLNDNVVVRGI  
QGFVLNWSFTLSLLAGLLAGGAGVLASLSSNVRMLRFAVPSLAIAGSALA  
ILSPLYVLLHHLPSLNIQFRPEVGAI AALFTGVAMAGGGFISAMIGFVVL  
RPSSGPSAPPAIAYAPVQTPVIEAQQEIALGYEEPSLSHEEEVFEEILRQ  
EEASIRAAAQPVPAEGTSPAPTTVPPQRPQTAAQCAICGEPISNSLRF  
CNTCGAPMHRECVETWRDIGGKCPSCGTPLV

>2527526036\_candidate\_division\_pSL4\_archaeon\_SCGC\_AAA471-B22\_Combined\_Assembly\_p  
SL4\_1\_pSL4  
MLVMGTDVRDALVRLIRIGALISVLGAIHVLTLMLDWASLLNDNVVVRGI  
QGFVLNWSFTLSLLAGLLAGGAGVLASLSSNVRMLRFAVPSLAIAGSALA  
ILSPLYVLLHHLPSLNIQFRPEVGAI AALFTGVAMAGGGFISAMIGFVVL  
RPSSGPSAPPAIAYAPVQTPVIEAQQEIALGYEEPSLSHEEEVFEEILRQ  
EEASIRAAAQPVPAEGTSPAPTTVPPQRPQTAAQCAICGEPISNSLRF

CNTCGAPMHRECVETWRDIGGKCPSCGTPLV

>2265089058\_candidate\_division\_pSL4\_archaeon\_JGI\_0000001-B8\_GBS-A\_001\_113  
VRRFRTPVVVEGRKAGEWFWGVICDSCLLEIDPSHTTTKCPHCGATFHSF  
CYTAILSSKGRCPKCKMELA

>2527529566\_candidate\_division\_pSL4\_archaeon\_SCGC\_AAA471-D15\_Combined\_Assembly\_p  
SL4\_2\_\_pSL4  
VRRFRTPVVVEGRKAGEWFWGVICDSCLLEIDPSHTTTKCPHCGATFHSF  
CYTAILSSKGRCPKCKMELA

>2265087851\_candidate\_division\_pSL4\_archaeon\_SCGC\_AAA471-E14\_GBS-N\_001\_10  
VLKVRSGRVLGRWEWGQPMCDACLEIEEGVEPLKCENCGANFHPDCYTS  
LKNTKAVCPKCKVTLE

>2265088700\_candidate\_division\_pSL4\_archaeon\_JGI\_0000001-A7\_GBS-A\_001\_112  
VLKVRSGRVLGRWEWGQPMCDACLEIEEGVEPLKCENCGANFHPDCYTS  
LKNTKAVCPKCKVTLE

>2527530169\_candidate\_division\_pSL4\_archaeon\_SCGC\_AAA471-E14\_Combined\_Assembly\_p  
SL4\_3\_\_pSL4  
VLKVRSGRVLGRWEWGQPMCDACLEIEEGVEPLKCENCGANFHPDCYTS  
LKNTKAVCPKCKVTLE

>315427002\_Candidatus\_Caldiarchaeum\_subterraneum  
MFKGFRGACFYKVGHLGLIGMVVSERRLLVRRFFQIGSVLALAGSIHVL TLLL PWYTVRADS SVSTS SVLSGY  
LLPETLALSVAGGVLAGLSLLVTSFSQRPMVRTVLVVL SLLGGVLAMVSPLYLGLVRVPALSVAGEPGI  
GFFIALFSAIVILALGGVALMTRPRVVEIPYQGYGGVSGATVSSTQPMETTSFEVAGEVEEGVVCPICT  
SVEAENAVRCSSCGVVFHSGCLDAYVNINGTCPNCGRAVV

>315428087\_Candidatus\_Caldiarchaeum\_subterraneum  
MRLVIREVNAGFWNPFEFPKPRPKQENCVICGLEMGNEKTYSCPHCGAVGHMSCFDDWL VVKQTCPLCRR  
PLVEM

>315428090\_Candidatus\_Caldiarchaeum\_subterraneum  
MVVSERRLLVRRFFQIGSVLALAGSIHVL TLLL PWYTVRADS SVSTS SVLSGYLLPETLALSVAGGVLAGLSL  
LVTSFSQRPMVRTVLVVL SLLGGVLAMVSPLYLGLVRVPALSVAGEPGIGFFIALFSAIVILALGGVAL  
MTRPRVVEIPYQGYGGVSGATVSSTQPMETTSFEVAGEVEEGVVCPICT SVEAENAVRCSSCGVVFHSG  
CLDAYVNINGTCPNCGRAVV

>343485674\_Candidatus\_Caldiarchaeum\_subterraneum  
MRLVIREVNAGFWNPFEFPKPRPKQENCVICGLEMGNEKTYSCPHCGAVGHMSCFDDWL VVKQTCPLCRR  
PLVEM

>343485677\_Candidatus\_Caldiarchaeum\_subterraneum  
MFKGFRGACFYKVGHLGLIGMVVSERRLLVRRFFQIGSVLALAGSIHVL TLLL PWYTVRADS SVSTS SVLSGY  
LLPETLALSVAGGVLAGLSLLVTSFSQRPMVRTVLVVL SLLGGVLAMVSPLYLGLVRVPALSVAGEPGI  
GFFIALFSAIVILALGGVALMTRPRVVEIPYQGYGGVSGATVSSTQPMETTSFEVAGEVEEGVVCPICT  
SVEAENAVRCSSCGVVFHSGCLDAYVNINGTCPNCGRAVV

>516675792\_Marine\_Group\_II\_euryarchaeote\_SCGC\_AB-629-J06  
MTCPICHNSITDINKVITECNHVFHFTCIYKNLKTNIISTGEOCPLCRKSFNAPTTSFSLCPPGYQSTSSL  
TNFGEQMRRIQNL YRRPQIPRSQNTLIRMINERRRSRPVPTYTEPQRVRRREIKRQIAKLSFSLKKNL  
REKGVSSRGYLRDTLEKRLFDKMIAE

>516675835\_Archaea  
MSTSITKETQTSVEKQVKEKASEKAEKAEKAEKAEQTCGICYTDLNDKNTVITPCNHAYCTSCFFKWLGR  
KETCALCRKVLLFDTIVEERLTDLQDVQAE LMDNYRCLSVLKKNIKKKKCKKKNL TDDINSLISRQIRM  
CLLEQTRSACRETLAHSRALKQAIELQRESLDLMKNYRSEWEELYTPLPLPPAEAEAEAEAEAEAEAEAEAE  
ALDNMVRLESRRARTELRLREAERAIAETIEVENSDDGDTASEADTVVVEDDMEEDDDEEGIEVDLTVF  
GTGIPTFDFTPAARRTVTVPTARNHTQSPMFVFGTNPMPSAITSAFEIPTESQDPPVIEMTRDPVELTDS  
IQESSFEWTPINLEMSDAMTRLVARPEMEPASTEEIEITDE

>516675873\_Marine\_Group\_II\_euryarchaeote\_SCGC\_AB-629-J06  
MSCLYNIFFKTNKIYAIDCEPYETEYSTNECAICLDSLNSQILTISCGHTYHSDCLLNWFEYNMTCPVCR  
TKFIWGRKRRKKRRHRQRNSRLL

>516675915\_Marine\_Group\_II\_euryarchaeote\_SCGC\_AB-629-J06  
MATQQQFITDLYRGNESDEGTIKYYKSRMVPSGTEFVYYPVICIKRYNTFEWVRFNDLSAALWMRYRNNME  
PEWISKSIFSGEKVKTDNKLVTSLLATLTIEQRKKWLTENSEYKDKICVECGAFEPEIKKCIHHDCSGMC  
ATCFDIKNKPGFENCACCLKQEMTCPICQEDFTTDKLVKSEQSHHCWSCFGRSVKSSRPLSHCPLCR  
GVFCEKLIIDIEDYDLDDIPGLEDDDDMPPLIEIDDDDWSEQDERFAMARAQEGMDFEAIIAAIANNFVTV  
RDRTVDGLEV

>516675918\_Marine\_Group\_II\_euryarchaeote\_SCGC\_AB-629-J06  
MAANILEGPPEEDVDKCIICLENLSAEPEYCLPECSHKFHQNCIMHWFRGGNCKCPLCNNLGINDKMDQ  
VSGTSWGWWRGGKYRYKMIRQYSRKKEAPAKLKKKEIAKLLKLEKKKSELKSIKDFKSKTGVWVDLHKQW  
GKLRRDRWRLDSNIRRRKMSIANFNIVPIIIAKKVNIP

>516676043\_Archaea  
MSTDLQLLRESIKTNISATTNVYDITGOWLPPGNYYFLINYTGLGCVKGELNCRGFKAETTFASKDIIKM  
MACAQARLARRANIRDDDMPTYNPITSPITANYPPNLVSHRYGNVQPPHTSPTMRTHRRRLPTINTRPTC  
TICLDVLDNDPKILSCQHKFHLACITRWYATRQTCPICRRRISIGLGTNRHSRYVVVNRHVTTYSRQTR  
ERTQNNRRPRPRAMPRRGYRNQQQLPSLIS

>516676225\_Marine\_Group\_II\_euryarchaeote\_SCGC\_AB-629-J06  
MDNSYNVICLKDLDMMNGVLTPCNHRYSSECFRWILKKRTCPLCRKELIAQPDIEERASLYELRRQID  
WESTLYNTLRNNVDTLERHILTKKNELENLNLQVHLKQKQLVTIINRYKQFMRNSQRNQRKRGLLF

>516676312\_Marine\_Group\_II\_euryarchaeote\_SCGC\_AB-629-J06  
MSIDPSNNIQESLINNTPSMETLDFFOYVMNRTMDIEHDMPNRNFISFLNHLDNSRNSTNMENIFSP  
PPPQVQWTNNILSSFVSDTSSNSTDNDSNNINYDNTNLYMRFIEDILQLPPLTSADNNNIRTLLRETLSE  
DKNPIKYVL SADGEQKIETVEFDPEIYPDINCCPITIKEFKKGMISKLP CNHL FNTDAILKWLKEEKAE  
CPICRFKLESIEKKFEKRDSYNTIQNGRVMSTRIIPPRIPGTNTRLPGYFGPPRMPRRRHNTHLRRLML  
SRHEQEEHEELQAALLASLEEYMPGHKTPKEDASDDASDIDSDTNDMETVD

>516676354\_Marine\_Group\_II\_euryarchaeote\_SCGC\_AB-629-J06  
MSKRPADNNKSDEQVLKKTMSLPLKLSKEEQEQIQKKIENDRCAICLQPLNDGRPLKYCDSVSHIPTK  
ENPRAHVHIFHKECINAWLRANNKDNNSCEPCGSQILCLDPDKYIEEIVNAPDPLRYNQDPDYNPDDIP  
SDDEEMNTEPKDNEGVDIDVDIWNQEHPRGPWWRVVIKCETPAQNCPYDENYPNHHGKNFQWFLSHEPEDV  
ELTDAQAATGWESIDGYKICPVCANADIRDYCEQCCEGYFFPEEHLTHVDELLCDECLQTRSATRGS  
KSRHGGRSRRKTPHKKNTQEKK

>526887492\_Candidatus\_Caldiarchaum\_subterraneum  
MRLVIREVNAGFWNPFEFPKPRPKQENCVICGLEMGNEKTYSCPHCGAVGHMSCFDDWL VVKQTCPLCRR  
PLVEM

>526887495\_Candidatus\_Caldiarchaum\_subterraneum  
MFKGFRGACFYKVGHLGLIGMVVSERRLLVRRFFQIGSVLALAGSIHVL TLLL PWYTVRADS SVSTS SVLSGY  
LLPETLALSVAGGVLAGLSLLVTSFSQRPMVRTVLVVL SLLGGVLAMVSPLYLGLVVRPALSVAGEPGI  
GFFIALFSAIVILALGGVALMTRPRVVEIPYQGYGGVSGATVSSTQPMETTSFEVAGEVEEGVVCPICT  
SVEAENAVRCSSCGVVFHSGCLDAYVNINGTCPNCGRAVV

>557694904\_Candidatus\_Caldiarchaum\_subterraneum  
MRLVIREVNAGFWNPFEFPKPRPKQENCVICGLEMGNEKTYSCPHCGAVGHMSCFDDWL VVKQTCPLCRR  
PLVEM

>557694907\_Candidatus\_Caldiarchaum\_subterraneum  
MFKGFRGACFYKVGHLGLIGMVVSERRLLVRRFFQIGSVLALAGSIHVL TLLL PWYTVRADS SVSTS SVLSGY  
LLPETLALSVAGGVLAGLSLLVTSFSQRPMVRTVLVVL SLLGGVLAMVSPLYLGLVVRPALSVAGEPGI  
GFFIALFSAIVILALGGVALMTRPRVVEIPYQGYGGVSGATVSSTQPMETTSFEVAGEVEEGVVCPICT  
SVEAENAVRCSSCGVVFHSGCLDAYVNINGTCPNCGRAVV
